# Supplementary material
Source: publisher figshare collection journal article supplement (https://tandf.figshare.com/ndownloader/files/5534060)
Supplement: Supplementary file 1 [file 5534060]

**Table S1.** List of gene IDs, gene names, primer sequences and amplicon size in qRT-PCR based gene expression analyses.

| **NCBI**  **Gene ID** | **Gene*** | **Primer Sequence 5’-3’** | **Amplicon Size (bp)** |
| --- | --- | --- | --- |
| 8678 | *BECN1* F | 5’-CAAGATCCTGGACCGTGTCA-3' | 191 |
| *BECN1* R | 5'-TGGCACTTTCTGTGGACATCA-3' |
| 64422 | *ATG3* F | 5’-TCACAACACAGGTATTACAGG-3’ | 240 |
| *ATG*3 R | 5’-TCACCGCCAGCATCAG-3’ |
| 26827 | *RNU6-1* F | 5’-CTCGCTTCGGCAGCACATATAC-3’ | 101 |
| *RNU6-1* R | 5’-AATATGGAACGCTTCACGAATTTG-3’ |
| *Leishmania* kDNA | *JW11* | 5’-CCTATTTTACACCAACCCCCAGT-3’ | 120 |
| *JW12* | 5’-GGGTAGGGGCGTTC TGCGAAA-3’ |
